# Supplementary material for: Factors Associated With 10-Year Declines in Physical Health and Function Among Women During Midlife
Source: PubMed Central journal article supplement (PMC8749479; doi:10.1001/jamanetworkopen.2021.42773), 2022-01-10
Supplement: jamanetwopen-e2142773-s001.pdf [file jamanetwopen-e2142773-s001.pdf]

## Supplemental Online Content

Solomon DH, Colvin A, Lange-Maia BS, et al. Factors associated with 10-year declines in physical health and function among women during midlife. *JAMA Netw Open*. 2022;5(1):e2142773. doi:10.1001/jamanetworkopen.2021.42773

**eTable 1.** Scoring of the Physical Component Score of the SF-36

**eTable 2.** Baseline Characteristics at Entry Into SWAN of Included Compared With Excluded SWAN Participants

**eTable 3.** Cox Proportional Hazard Regression Model Results

**eAppendix.** The Study of Women's Health Across the Nation (SWAN) Contributors

This supplemental material has been provided by the authors to give readers additional information about their work.

**eTable 1.** Scoring of the Physical Component Score of the SF-36

| SF-36 Domains        | Orthogonal PCS |
|----------------------|----------------|
| Physical Function    | 0.42           |
| Role-Physical        | 0.35           |
| Bodily Pain          | 0.32           |
| General Health       | 0.25           |
| Vitality             | 0.03           |
| Social Functioning   | -0.01          |
| Role-Emotional       | -0.19          |
| Emotional Well-Being | -0.22          |

Adapted from Farivar SS, Cunningham WE, Hays, RD. Correlated physical and mental health summary scores for the SF-36 and SF-12 Health Survey. *Health and Quality of Life Outcomes* 2007;5:54. The PCS is computed using an aggregate physical component score from weighted z-scores, and then transforming the aggregate score to a norm-base score with a mean of 50 and standard deviation of 10, using the 1998 general U.S. population.

**eTable 2.** Baseline Characteristics at Entry Into SWAN of Included Compared With Excluded SWAN Participants

| Characteristics at SWAN baseline       | Included Women<br>(n = 1091)                 | Excluded Women<br>(n = 2211) | P value | Total SWAN Cohort |
|----------------------------------------|----------------------------------------------|------------------------------|---------|-------------------|
|                                        | <i>N (%) or median (interquartile range)</i> |                              |         |                   |
| Age, years                             | 46.6 (45.0, 48.3)                            | 45.7 (43.6, 48.2)            | <0.0001 | 46.2 (44.1, 48.3) |
| Body mass index, kg/m <sup>2</sup>     | 25.4 (22.2, 30.8)                            | 27.3 (23.3, 32.6)            | <0.0001 | 26.7 (22.9, 32.1) |
| Insurance status, none                 | 40 (3.7)                                     | 233 (10.6)                   | <0.0001 | 273 (8.3)         |
| Race or ethnicity                      |                                              |                              | <0.0001 |                   |
| Black                                  | 264 (24.2)                                   | 670 (30.3)                   |         | 934 (28.3)        |
| Chinese                                | 126 (11.6)                                   | 124 (5.6)                    |         | 250 (7.6)         |
| Hispanic                               | 0 (0.0)                                      | 286 (12.9)                   |         | 286 (8.7)         |
| Japanese                               | 135 (12.4)                                   | 146 (6.6)                    |         | 281 (8.5)         |
| White                                  | 566 (51.9)                                   | 985 (44.6)                   |         | 1551 (47.0)       |
| Menopausal status                      |                                              |                              | 0.1555  |                   |
| Early Peri                             | 472 (43.4)                                   | 1029 (47.0)                  |         | 1501 (45.8)       |
| Pre                                    | 613 (56.4)                                   | 1157 (52.8)                  |         | 1770 (54.0)       |
| Unknown/HT                             | 2 (0.2)                                      | 4 (0.2)                      |         | 6 (0.2)           |
| Smoking status, never                  | 678 (62.1)                                   | 1212 (54.9)                  | <0.0001 | 1890 (57.3)       |
| Past                                   | 280 (25.7)                                   | 550 (24.9)                   |         | 830 (25.3)        |
| Current                                | 133 (12.2)                                   | 447 (20.2)                   |         | 580 (17.6)        |
| Alcohol use, none                      | 506 (46.4)                                   | 1047 (47.4)                  | 0.0021  | 1553 (47.0)       |
| <1/week                                | 90 (8.3)                                     | 236 (10.7)                   |         | 326 (9.9)         |
| 1-7/week                               | 290 (26.6)                                   | 523 (23.7)                   |         | 813 (24.6)        |
| >7/week                                | 160 (14.7)                                   | 281 (12.7)                   |         | 441 (13.4)        |
| Missing                                | 45 (4.1)                                     | 124 (5.6)                    |         | 169 (5.1)         |
| Education – College or graduate degree | 500 (50.6)                                   | 851 (39.0)                   | <0.0001 | 1401 (42.8)       |
| High school or less                    | 537 (49.4)                                   | 1333 (61.0)                  |         | 1870 (57.2)       |
| Sleep Disturbance                      | 277 (25.4)                                   | 665 (30.1)                   | 0.0050  | 942 (28.5)        |
| Diabetes                               | 50 (4.6)                                     | 163 (7.4)                    | 0.0021  | 213 (6.5)         |
| Hypertension                           | 198 (18.2)                                   | 476 (21.5)                   | 0.0234  | 674 (20.4)        |
| Hyperlipidemia                         | 185 (16.9)                                   | 435 (19.7)                   | 0.0600  | 620 (18.8)        |
| CVD                                    | 25 (2.3)                                     | 124 (5.6)                    | <0.0001 | 149 (4.5)         |
| Osteoarthritis                         | 167 (15.3)                                   | 418 (18.9)                   | 0.0109  | 585 (17.7)        |
| Osteoporosis                           | 18 (1.7)                                     | 65 (2.9)                     | 0.0259  | 83 (2.5)          |
| Thyroid disease                        | 122 (11.2)                                   | 247 (11.2)                   | 0.9925  | 369 (11.2)        |
| Cancer                                 | 25 (2.3)                                     | 40 (1.8)                     | 0.3687  | 65 (2.0)          |
| Depression as defined by CES-D ≥ 16    | 228 (20.9)                                   | 576 (26.1)                   | 0.0010  | 804 (24.4)        |
| Kaiser Physical Activity Score         | 7.7 (6.6, 9.0)                               | 7.5 (6.3, 8.8)               | 0.0015  | 7.6 (6.4, 8.9)    |
| C-reactive protein                     | 1.4 (0.5, 4.6)                               | 2.2 (0.8, 6.6)               | 0.0004  | 1.8 (0.6, 5.9)    |

CES-D, Center for Epidemiologic Studies-Depression. NA, not available.

**eTable 3.** Cox Proportional Hazard Regression Model Results

| <b>Characteristic at Age 55</b>                    | <b>Hazard Ratio (95% Confidence Interval)</b> |
|----------------------------------------------------|-----------------------------------------------|
| N with 8-point decline at any timepoint            | 681                                           |
| BMI                                                | 1.02 (1.01, 1.03)                             |
| Education (Some college or more)                   | Reference                                     |
| High School or less                                | 1.13 (0.97, 1.32)                             |
| Osteoarthritis                                     | 1.30 (1.11, 1.53)                             |
| Cancer                                             | 1.24 (0.97, 1.58)                             |
| CES-D                                              | 1.56 (1.30, 1.88)                             |
| Kaiser Physical Activity Score                     | 0.97 (0.93, 1.01)                             |
| CES-D, Center for Epidemiologic Studies-Depression |                                               |

## **eAppendix.** The Study of Women's Health Across the Nation (SWAN)

### Contributors

Clinical Centers: University of Michigan, Ann Arbor – Siobán Harlow, PI 2011 – present, MaryFran Sowers, PI 1994-2011; Massachusetts General Hospital, Boston, MA – Sherri-Ann Burnett-Bowie, PI 2020 – Present; Joel Finkelstein, PI 1999 – 2020; Robert Neer, PI 1994 – 1999; Rush University, Rush University Medical Center, Chicago, IL – Imke Janssen, PI 2020 – Present; Howard Kravitz, PI 2009 – 2020; Lynda Powell, PI 1994 – 2009; University of California, Davis/Kaiser – Elaine Waetjen and Monique Hedderson, PIs 2020 – Present; Ellen Gold, PI 1994 - 2020; University of California, Los Angeles – Arun Karlamangla, PI 2020 – Present; Gail Greendale, PI 1994 - 2020; Albert Einstein College of Medicine, Bronx, NY – Carol Derby, PI 2011 – present, Rachel Wildman, PI 2010 – 2011; Nanette Santoro, PI 2004 – 2010; University of Medicine and Dentistry – New Jersey Medical School, Newark – Gerson Weiss, PI 1994 – 2004; and the University of Pittsburgh, Pittsburgh, PA – Rebecca Thurston, PI 2020 – Present; Karen Matthews, PI 1994 - 2020. NIH Program Office: National Institute on Aging, Bethesda, MD – Rosaly Correa-de-Araujo 2020 - present; Chhanda Dutta 2016- present; Winifred Rossi 2012– 2016; Sherry Sherman 1994 – 2012; Marcia Ory 1994 – 2001; National Institute of Nursing Research, Bethesda, MD – Program Officers. Central Laboratory: University of Michigan, Ann Arbor – Daniel McConnell (Central Ligand Assay Satellite Services). Coordinating Center: University of Pittsburgh, Pittsburgh, PA – Maria Mori Brooks, PI 2012 - present; Kim Sutton-Tyrrell, PI 2001 – 2012; New England Research Institutes, Watertown, MA - Sonja McKinlay, PI 1995 – 2001. Steering Committee: Susan Johnson, Current Chair; Chris Gallagher, Former Chair. We thank the study staff at each site and all the women who participated in SWAN.
